# Supplementary material for: Highly dispersed Ru nanoparticles on a bipyridine-linked covalent organic framework for efficient photocatalytic CO2reduction
Source: Royal Society of Chemistry journal article supplement (doi:10.1039/d1se00358e), 2021-01-01
Supplement: d1se00358e1.pdf [file d1se00358e1.pdf]

## Supplementary Material

### **Highly dispersed Ru nanoparticles on a bipyridine-linked covalent organic framework for efficient photocatalytic CO<sub>2</sub> reduction**

Ziling Liu,<sup>a</sup> Yaqi Huang,<sup>a</sup> Shuqing Chang,<sup>a</sup> Xiaoli Zhu,<sup>a</sup> Yanghe Fu,<sup>\*ab</sup> Rui Ma,<sup>ab</sup>

Xinqing Lu,<sup>ab</sup> Fumin Zhang,<sup>ab</sup> Weidong Zhu<sup>\*ab</sup> and Maohong Fan<sup>\*c</sup>

<sup>a</sup> *Key Laboratory of the Ministry of Education for Advanced Catalysis Materials, Institute of Physical Chemistry, Zhejiang Normal University, Jinhua 321004, China*

<sup>b</sup> *Zhejiang Engineering Laboratory for Green Syntheses and Applications of Fluorine-Containing Specialty Chemicals, Institute of Advanced Fluorine-Containing Materials, Zhejiang Normal University, Jinhua 321004, China*

<sup>c</sup> *Department of Chemical and Petroleum Engineering, University of Wyoming, Laramie, WY 82071, USA.*

---

\*Corresponding authors:

E-mail addresses: [yhfu@zjnu.cn](mailto:yhfu@zjnu.cn) (Y. Fu), [weidongzhu@zjnu.cn](mailto:weidongzhu@zjnu.cn) (W. Zhu), and [mfan@uwyo.edu](mailto:mfan@uwyo.edu) (M. Fan)

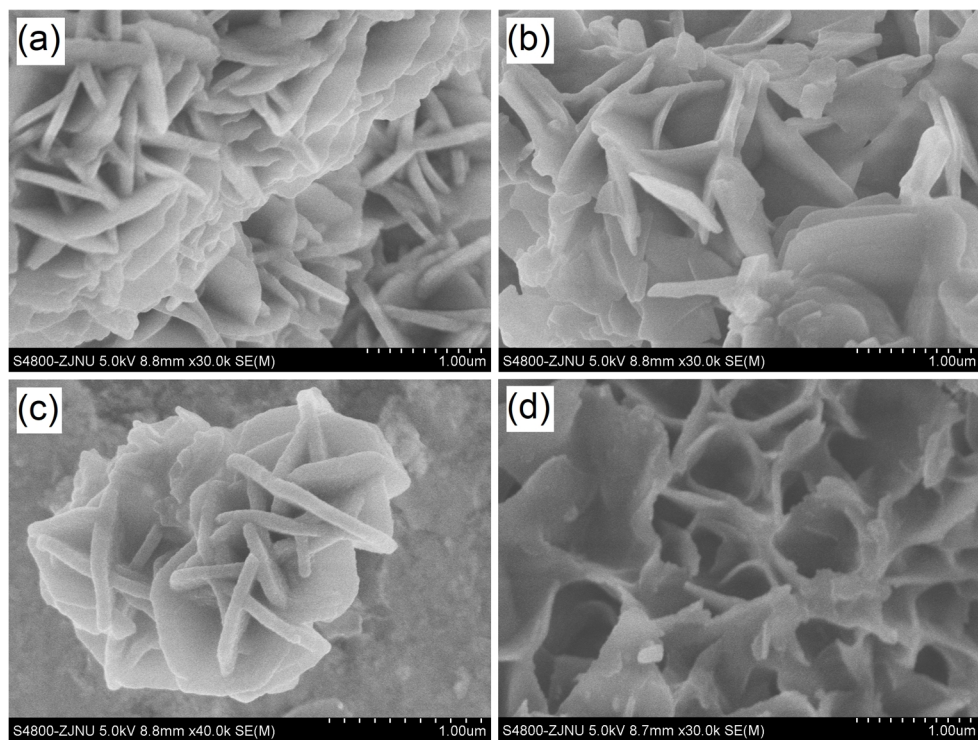

**Fig. S1.** SEM images of TpBpy (a), 1-Ru@TpBpy (b), 2-Ru@TpBpy (c), and 3-Ru@TpBpy (d).

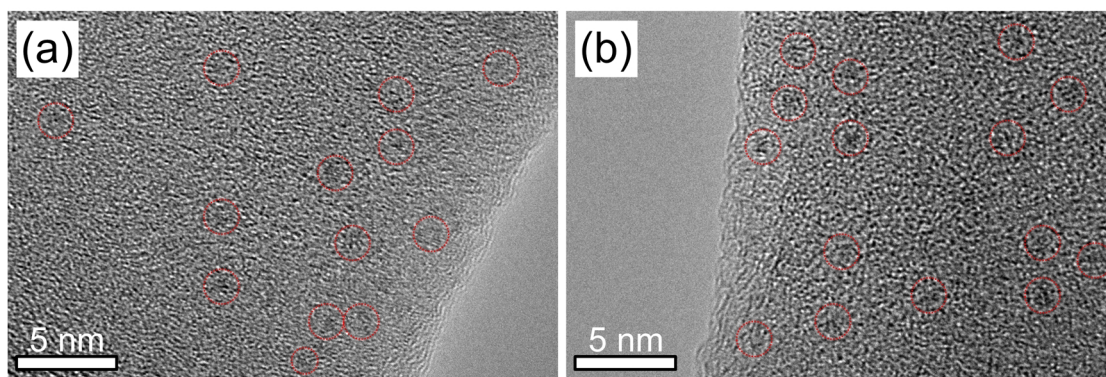

**Fig. S2.** HR-TEM images of the fresh (a) and used (b) 1-Ru@TpBpy after the 5<sup>th</sup>-run photocatalytic reaction.

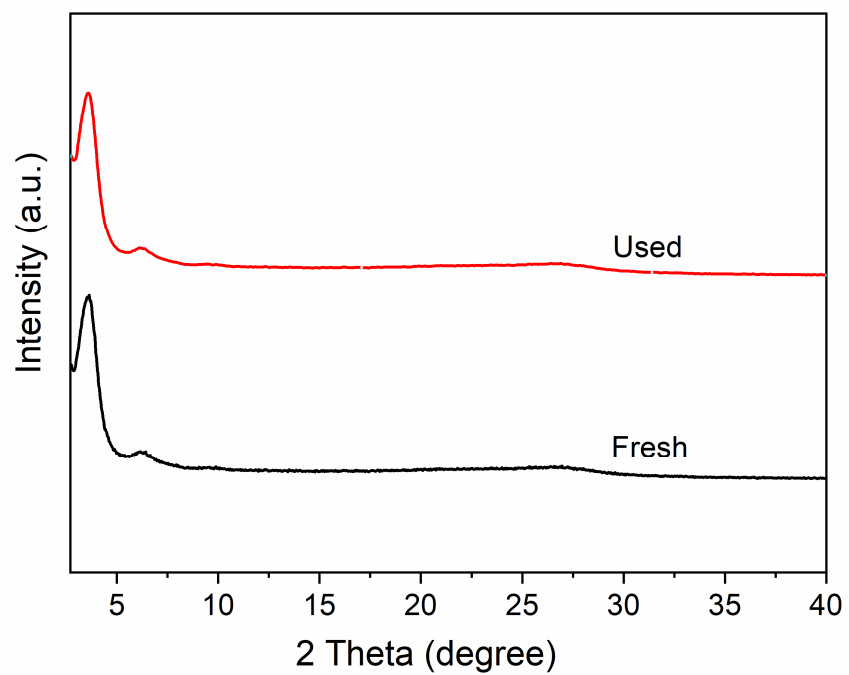

**Fig. S3.** XRD patterns of the fresh (black) and used 1-Ru@TpBpy after the 5<sup>th</sup>-run photocatalytic reaction (red).

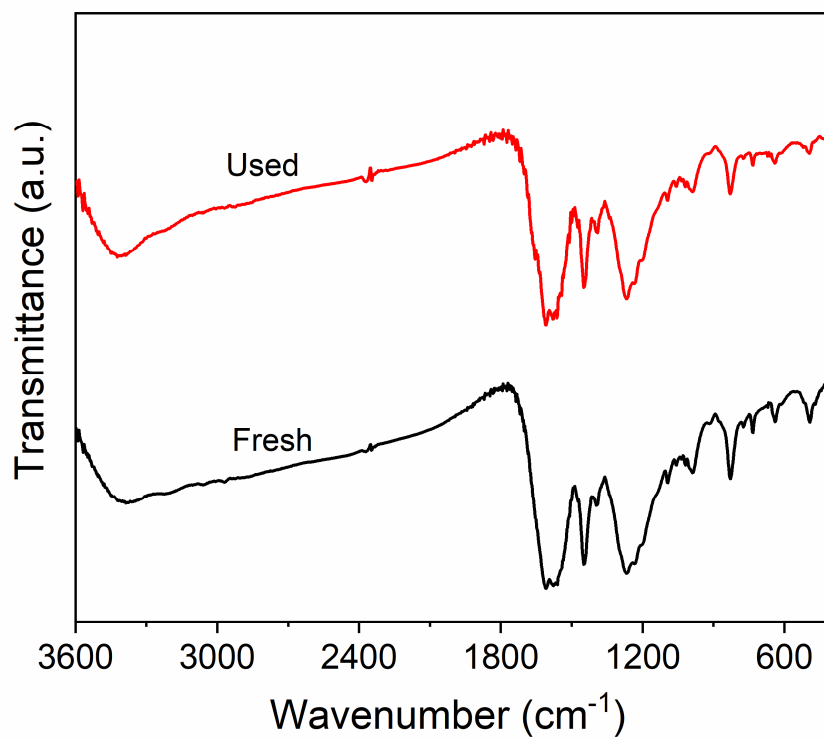

**Fig. S4.** FT-IR spectra of the fresh (black) and the used (red) 1-Ru@TpBpy after the 5<sup>th</sup>-run photocatalytic reaction.

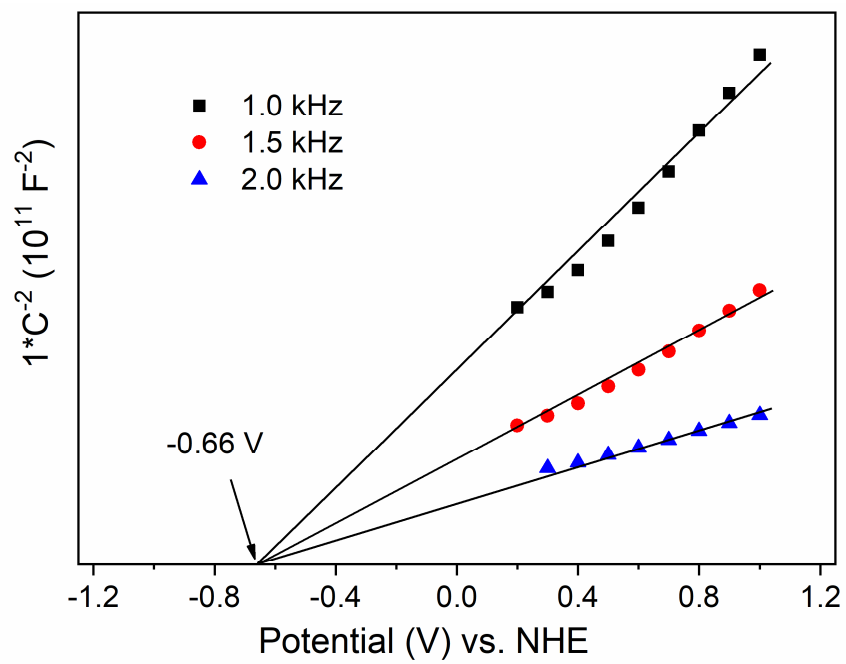

**Fig. S5.** Mott-Schottky plots of TpBpy measured at different frequencies.

**Table S1.** Summary of the photocatalytic CO<sub>2</sub> reduction performances over COF- and MOF-based catalysts

| Photocatalyst                         | Photosensitizer                        | Product                                                                   | Light source                      | Ref.      |
|---------------------------------------|----------------------------------------|---------------------------------------------------------------------------|-----------------------------------|-----------|
|                                       |                                        | Yield*<br>( $\mu\text{mol}\cdot\text{g}^{-1}_{\text{cat}}\text{h}^{-1}$ ) |                                   |           |
| 1-Ru@TpBpy                            | -                                      | HCOOH: 172                                                                | 300 W Xe lamp<br>(420-800 nm)     | This work |
| TpBD-(OCH <sub>3</sub> ) <sub>2</sub> | -                                      | HCOOH: 108.3                                                              | 300 W Xe lamp<br>(420-800 nm)     | 1         |
| 3.0 wt.% Ru/TpPa-1                    | -                                      | HCOOH: 108.8                                                              | 300 W Xe lamp<br>(420-800 nm)     | 2         |
| N <sub>3</sub> -COF                   | -                                      | CH <sub>3</sub> OH: 0.57                                                  | 500 W Xe lamp<br>(420-800 nm)     | 3         |
| TTCOF-Zn                              | -                                      | CO: 2.1                                                                   | 300 W Xe lamp<br>(420-800 nm)     | 4         |
| COF-318-TiO <sub>2</sub>              | -                                      | CO: 69.7                                                                  | 300 W Xe lamp<br>(380-800 nm)     | 5         |
| CT-COF                                | -                                      | CO: 102.7                                                                 | 300 W Xe lamp<br>( $\geq 420$ nm) | 6         |
| Ni-TpBpy                              | [Ru(bpy) <sub>3</sub> ]Cl <sub>2</sub> | CO: 324.6                                                                 | 300 W Xe lamp<br>( $\geq 420$ nm) | 7         |
| Re-CTF                                | [Re(CO) <sub>5</sub> ]Cl               | CO: 353.1                                                                 | 300 W Xe lamp<br>(200-1100 nm)    | 8         |
| Re-COF                                | [Re(CO) <sub>5</sub> ]Cl               | CO: 750                                                                   | 225 W Xe lamp<br>( $\geq 420$ nm) | 9         |
| Re-TpBpy                              | [Re(CO) <sub>5</sub> ]Cl               | CO: 270.8                                                                 | 200 W Xe lamp<br>( $\geq 390$ nm) | 10        |
| DQTP COF-Co                           | [Ru(bpy) <sub>3</sub> ]Cl <sub>2</sub> | HCOOH: 333.5<br>CO: 480                                                   | 300 W Xe lamp<br>( $\geq 420$ nm) | 11        |
| Ni-PCD@TD-COF                         | [Ru(bpy) <sub>3</sub> ]Cl <sub>2</sub> | CO: 95.6                                                                  | 300 W Xe lamp<br>( $\geq 420$ nm) | 12        |
| NH <sub>2</sub> -MIL-125(Ti)          | -                                      | HCOOH: 16.3                                                               | 300 W Xe lamp<br>(420-800 nm)     | 13        |
| NH <sub>2</sub> -UiO-66(Zr)           | -                                      | HCOOH: 26.4                                                               | 300 W Xe lamp<br>(420-800 nm)     | 14        |
| Pt/NH <sub>2</sub> -MIL-125(Ti)       | -                                      | HCOOH: 25.9                                                               | 300 W Xe lamp<br>(420-800 nm)     | 15        |
| PCN-222(Zr)                           | -                                      | HCOOH: 60                                                                 | 300 W Xe lamp<br>(420-800 nm)     | 16        |

References:

- [1] L. Peng, S. Chang, Z. Liu, Y. Fu, R. Ma, X. Lu, F. Zhang, W. Zhu, L. Kong and M. Fan, *Catal. Sci. Technol.*, 2021, **11**, DOI: 10.1039/D0CY02061C.

- [2] K. Guo, X. Zhu, L. Peng, Y. Fu, R. Ma, X. Lu, F. Zhang, W. Zhu and M. Fan, *Chem. Eng. J.*, 2021, **405**, 127011.
- [3] Y. Fu, X. Zhu, L. Huang, X. Zhang, F. Zhang and W. Zhu, *Appl. Catal. B: Environ.*, 2018, **239**, 46-51.
- [4] M. Lu, J. Liu, Q. Li, M. Zhang, M. Liu, J. Wang, D. Yuan and Y. Lan, *Angew. Chem. Int. Ed.*, 2019, **58**, 12392-12397.
- [5] M. Zhang, M. Lu, Z. Lang, J. Liu, M. Liu, J. Chang, L. Li, L. Shang, M. Wang, S. Li and Y. Lan, *Angew. Chem. Int. Ed.*, 2020, **59**, 6500-6506.
- [6] K. Lei, D. Wang, L. Ye, M. Kou, Y. Deng, Z. Ma, L. Wang and Y. Kong, *ChemSusChem*, 2020, **13**, 1725-1729.
- [7] W. Zhong, R. Sa, L. Li, Y. He, L. Li, J. Bi, Z. Zhuang, Y. Yu and Z. Zou, *J. Am. Chem. Soc.*, 2019, **141**, 7615-7621.
- [8] R. Xu, X. Wang, H. Zhao, H. Lin, Y. Huang and R. Cao, *Catal. Sci. Technol.*, 2018, **8**, 2224-2230.
- [9] S. Yang, W. Hu, X. Zhang, P. He, B. Pattengale, C. Liu, M. Cendejas, I. Hermans, X. Zhang, J. Zhang and J. Huang, *J. Am. Chem. Soc.*, 2018, **140**, 14614-14618.
- [10] S.-Y. Li, S. Meng, X. Zou, M. El-Roz, I. Telegeev, O. Thili, T. X. Liu and G. Zhu, *Microporous Mesoporous Mater.*, 2019, **285**, 195-201.
- [11] M. Lu, Q. Li, J. Liu, F. Zhang, L. Zhang, J. Wang, Z. Kang and Y. Lan, *Appl. Catal. B: Environ.*, 2019, **254**, 624-633.
- [12] H. Zhong, R. Sa, H. Lv, S. Yang, D. Yuan, X. Wang and R. Wang, *Adv. Funct. Mater.*, 2020, **30**, 2002654.



- [13] Y. Fu, D. Sun, Y. Chen, R. Huang, Z. Ding, X. Fu and Z. Li, *Angew. Chem. Int. Ed.*, 2012, **51**, 3364-3367.
- [14] D. Sun, Y. Fu, W. Liu, L. Ye, D. Wang, L. Yang, X. Fu and Z. Li, *Chem. Eur. J.*, 2013, **19**, 14279-14285.
- [15] D. Sun, W. Liu, Y. Fu, Z. Fang, F. Sun, X. Fu, Y. Zhang and Z. Li, *Chem. Eur. J.*, 2014, **20**, 4780-4788.
- [16] H. Xu, J. Hu, D. Wang, Z. Li, Q. Zhang, Y. Luo, S. Yu and H Jiang, *J. Am. Chem. Soc.*, 2015, **137**, 13440-13443.
